# Supplementary material for: Copolymerization of CHO/CO2 catalyzed by a series of aluminum amino-phenolate complexes and insights into structure–activity relationships
Source: Royal Society of Chemistry journal article supplement (doi:10.1039/d0dt00726a), 2020-01-01
Supplement: d0dt00726a1.pdf [file d0dt00726a1.pdf]

## Supporting Information for

### Copolymerization of CHO/CO<sub>2</sub> catalyzed by a series of aluminum amino-phenolate complexes and insights into structure-activity relationships

Hart Plommer,<sup>ab</sup> Laura Stein,<sup>a</sup> Jennifer N. Murphy,<sup>a</sup> Nduka Ikpo,<sup>a</sup> Nelaine Mora-Diez,<sup>b</sup>  
and Francesca M. Kerton<sup>\*a</sup>

a) Department of Chemistry, Memorial University of Newfoundland, St. John's, NL, A1B  
3X7, Canada

b) Department of Chemistry, Thompson Rivers University, Kamloops, BC, V2C 0C8,  
Canada

|                                                                                                                                                                                                                                                                                                                                                                                                                                                                                                                                                                                                                                                              |    |
|--------------------------------------------------------------------------------------------------------------------------------------------------------------------------------------------------------------------------------------------------------------------------------------------------------------------------------------------------------------------------------------------------------------------------------------------------------------------------------------------------------------------------------------------------------------------------------------------------------------------------------------------------------------|----|
| <b>Figure S1.</b> Molecular structure and partial numbering of <b>2</b> (thermal ellipsoids drawn at 50% probability; H atoms and two co-crystallized toluene molecules excluded for clarity). Selected bond distances (Å) and angles (°): Cl(1)–Al(1), 2.2532(13); Al(1)–O(1), 1.752(3); Al(1)–O(2), 1.745(3); Al(1)–N(1), 2.069(3); Al(1)–N(2), 2.116(3); O(1)–Al(1)–Cl(1), 93.88(9); O(1)–Al(1)–N(1), 113.11(12); O(1)–Al(1)–N(2), 91.21(12); O(2)–Al(1)–Cl(1), 91.05(9); O(2)–Al(1)–O(1), 124.52(13); O(2)–Al(1)–N(1), 122.09(13); O(2)–Al(1)–N(2), 90.72(12); N(1)–Al(1)–Cl(1), 90.40(9); N(1)–Al(1)–N(2), 82.40(12); N(2)–Al(1)–Cl(1), 172.39(10)..... | 4  |
| <b>Figure S2.</b> <sup>1</sup> H NMR spectrum of H[L2] in CDCl <sub>3</sub> , 298 K.....                                                                                                                                                                                                                                                                                                                                                                                                                                                                                                                                                                     | 5  |
| <b>Figure S3.</b> <sup>13</sup> C { <sup>1</sup> H} NMR spectrum of H[L2] in CDCl <sub>3</sub> , 298 K.....                                                                                                                                                                                                                                                                                                                                                                                                                                                                                                                                                  | 6  |
| <b>Figure S4.</b> <sup>1</sup> H NMR spectrum of <b>2</b> in CDCl <sub>3</sub> , 298 K.....                                                                                                                                                                                                                                                                                                                                                                                                                                                                                                                                                                  | 7  |
| <b>Figure S5.</b> HSQC spectrum of <b>2</b> in CDCl <sub>3</sub> , 298 K.....                                                                                                                                                                                                                                                                                                                                                                                                                                                                                                                                                                                | 8  |
| <b>Figure S6.</b> <sup>13</sup> C-DEPT NMR spectrum of <b>2</b> in CDCl <sub>3</sub> , 298 K.....                                                                                                                                                                                                                                                                                                                                                                                                                                                                                                                                                            | 9  |
| <b>Figure S7.</b> <sup>1</sup> H NMR spectrum of <b>3</b> in CDCl <sub>3</sub> , 298 K (residual toluene resonance at 2.36 ppm).....                                                                                                                                                                                                                                                                                                                                                                                                                                                                                                                         | 10 |
| <b>Figure S8.</b> <sup>13</sup> C-DEPT NMR spectrum of <b>3</b> in CDCl <sub>3</sub> , 298 K.....                                                                                                                                                                                                                                                                                                                                                                                                                                                                                                                                                            | 11 |
| <b>Figure S9.</b> COSY spectrum of <b>3</b> in CDCl <sub>3</sub> , 298 K.....                                                                                                                                                                                                                                                                                                                                                                                                                                                                                                                                                                                | 12 |
| <b>Figure S10.</b> HSQC spectrum of <b>3</b> in CDCl <sub>3</sub> , 298 K.....                                                                                                                                                                                                                                                                                                                                                                                                                                                                                                                                                                               | 13 |
| <b>Figure S11.</b> <sup>13</sup> C spectrum of <b>4</b> in CDCl <sub>3</sub> , 298 K.....                                                                                                                                                                                                                                                                                                                                                                                                                                                                                                                                                                    | 14 |
| <b>Figure S12.</b> HSQC spectrum of <b>4</b> in CDCl <sub>3</sub> , 298 K.....                                                                                                                                                                                                                                                                                                                                                                                                                                                                                                                                                                               | 15 |
| <b>Figure S13.</b> <sup>1</sup> H NMR spectrum of <b>5</b> in CDCl <sub>3</sub> , 298 K (residual toluene resonance at 2.41 ppm).....                                                                                                                                                                                                                                                                                                                                                                                                                                                                                                                        | 16 |
| <b>Figure S14.</b> <sup>13</sup> C NMR spectrum of <b>5</b> in CDCl <sub>3</sub> , 298 K.....                                                                                                                                                                                                                                                                                                                                                                                                                                                                                                                                                                | 17 |
| <b>Figure S15.</b> HSQC spectrum of <b>5</b> in CDCl <sub>3</sub> , 298 K.....                                                                                                                                                                                                                                                                                                                                                                                                                                                                                                                                                                               | 18 |
| <b>Figure S16.</b> Monitoring of IR absorptions over time at variable temperatures for the reaction of <b>1</b> +PPNCl+CHO (1/1/500) at 40 bar CO <sub>2</sub> . Red (1800 cm <sup>-1</sup> , CHC formation) and green (1750 cm <sup>-1</sup> , PCHC formation). Note: Under ideal circumstances, individual and replicant reactions should be performed at each temperature. ....                                                                                                                                                                                                                                                                           | 19 |
| <b>Figure S17.</b> MALDI-TOF mass spectrum of H[L2].....                                                                                                                                                                                                                                                                                                                                                                                                                                                                                                                                                                                                     | 20 |
| <b>Figure S18.</b> MALDI-TOF MS spectra of <b>2</b> .....                                                                                                                                                                                                                                                                                                                                                                                                                                                                                                                                                                                                    | 21 |
| <b>Figure S19.</b> MALDI-TOF mass spectra of <b>4.3</b> (experimental – top, theoretical – bottom).....                                                                                                                                                                                                                                                                                                                                                                                                                                                                                                                                                      | 22 |

|                                                                                                                                            |    |
|--------------------------------------------------------------------------------------------------------------------------------------------|----|
| <b>Figure S20.</b> Representative GPC trace of isolated PCHC (Table 1, entry 6; the peaks around 80 min are due to the delay volume) ..... | 23 |
| <b>Figure S21.</b> Possible catalytic mechanisms for ROCOP mediated by Al complexes .....                                                  | 27 |
| <b>Table S1.</b> Crystallographic and structure refinement data for compounds H[L2], 2, 4, and 5.....                                      | 3  |
| <b>Table S2.</b> Experimental (X-ray) and calculated (M06/6-311+G(d,p)) bond distances of 1, 2, 4, and 5 .....                             | 24 |
| <b>Table S3.</b> Calculated charges of pendent nitrogen in initial pro-ligands and Al-Cl complexes...                                      | 25 |
| <b>Table S4.</b> Calculated (M06/6-311+G(d,p)) Al charges and relevant bond distances of Al-carbonate derivatives .....                    | 25 |
| <b>Table S5.</b> Highly active catalyst systems for copolymerization of CHO/CO <sub>2</sub> .....                                          | 26 |

**Table S1.** Crystallographic and structure refinement data for compounds H[L2], 2, 4, and 5

| Compounds                                    | H[L2]                                           | 2                                                                 | 4                                                                  | 5                                                                                              |
|----------------------------------------------|-------------------------------------------------|-------------------------------------------------------------------|--------------------------------------------------------------------|------------------------------------------------------------------------------------------------|
| Chemical formula                             | C <sub>21</sub> H <sub>35</sub> NO <sub>2</sub> | C <sub>48</sub> H <sub>70</sub> AlClN <sub>2</sub> O <sub>2</sub> | C <sub>42</sub> H <sub>68</sub> N <sub>2</sub> O <sub>2</sub> AlCl | C <sub>75</sub> H <sub>111</sub> Al <sub>2</sub> Cl <sub>2</sub> N <sub>4</sub> O <sub>4</sub> |
| Formula weight                               | 333.51                                          | 769.49                                                            | 695.41                                                             | 1257.53                                                                                        |
| Temperature/K                                | 123                                             | 100                                                               | 293(2)                                                             | 100                                                                                            |
| Crystal system                               | monoclinic                                      | monoclinic                                                        | triclinic                                                          | triclinic                                                                                      |
| Space group                                  | P2 <sub>1</sub> /c                              | P2 <sub>1</sub> /n                                                | P-1                                                                | P-1                                                                                            |
| a/Å                                          | 12.013(4)                                       | 13.1378(4)                                                        | 11.4893(3)                                                         | 7.7750(2)                                                                                      |
| b/Å                                          | 17.863(6)                                       | 24.9763(6)                                                        | 13.7084(4)                                                         | 11.1513(3)                                                                                     |
| c/Å                                          | 9.836(3)                                        | 14.4263(4)                                                        | 15.1276(3)                                                         | 21.4322(5)                                                                                     |
| $\alpha$ /°                                  | 90                                              | 90                                                                | 111.101(2)                                                         | 75.708(2)                                                                                      |
| $\beta$ /°                                   | 101.484(5)                                      | 110.413(3)                                                        | 105.252(2)                                                         | 89.494(2)                                                                                      |
| $\gamma$ /°                                  | 90                                              | 90                                                                | 93.044(2)                                                          | 74.480(2)                                                                                      |
| Volume/Å <sup>3</sup>                        | 2068.5(12)                                      | 4436.5(2)                                                         | 2115.43(10)                                                        | 1731.77(8)                                                                                     |
| Z                                            | 4                                               | 4                                                                 | 2                                                                  | 1                                                                                              |
| $D_c$ /g cm <sup>-3</sup>                    | 1.071                                           | 1.152                                                             | 1.092                                                              | 1.206                                                                                          |
| Radiation type                               | MoK $\alpha$ ( $\lambda$ = 0.71075)             | MoK $\alpha$ ( $\lambda$ = 0.71073)                               | MoK $\alpha$ ( $\lambda$ = 0.71073)                                | MoK $\alpha$ ( $\lambda$ = 0.71073)                                                            |
| $\mu$ (MoK $\alpha$ )/mm <sup>-1</sup>       | 0.067                                           | 0.145                                                             | 0.145                                                              | 0.171                                                                                          |
| F(000)                                       | 736                                             | 1672.0                                                            | 760.0                                                              | 681.0                                                                                          |
| Reflections measured                         | 21073                                           | 56957                                                             | 27634                                                              | 22667                                                                                          |
| Unique reflections                           | 4291                                            | 8121                                                              | 8009                                                               | 6588                                                                                           |
| $R_{int}$                                    | 0.0239                                          | 0.1011                                                            | 0.0425                                                             | 0.0403                                                                                         |
| $R_I$ (all)                                  | 0.0529                                          | 0.1157                                                            | 0.0604                                                             | 0.0675                                                                                         |
| $wR(F^2)$ (all)                              | 0.1276                                          | 0.1875                                                            | 0.1249                                                             | 0.1563                                                                                         |
| $R_I$ ( $I > 2 \sigma(I)$ ) <sup>a</sup>     | 0.0497                                          | 0.0981                                                            | 0.0491                                                             | 0.0598                                                                                         |
| $wR(F^2)$ ( $I > 2 \sigma(I)$ ) <sup>b</sup> | –                                               | 0.1769                                                            | 0.1161                                                             | 0.1499                                                                                         |
| Goodness of fit on $F^2$                     | 1.112                                           | 1.181                                                             | 1.058                                                              | 1.086                                                                                          |
| CCDC Ref.                                    | 1912327                                         | 1936692                                                           | 1936648                                                            | 1936691                                                                                        |

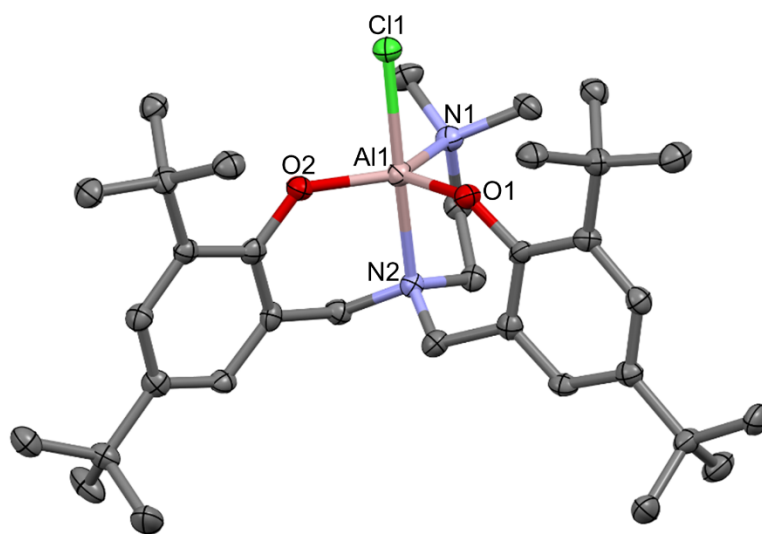

**Figure S1.** Molecular structure and partial numbering of **2** (thermal ellipsoids drawn at 50% probability; H atoms and two co-crystallized toluene molecules excluded for clarity). Selected bond distances (Å) and angles (°): Cl(1)–Al(1), 2.2532(13); Al(1)–O(1), 1.752(3); Al(1)–O(2), 1.745(3); Al(1)–N(1), 2.069(3); Al(1)–N(2), 2.116(3); O(1)–Al(1)–Cl(1), 93.88(9); O(1)–Al(1)–N(1), 113.11(12); O(1)–Al(1)–N(2), 91.21(12); O(2)–Al(1)–Cl(1), 91.05(9); O(2)–Al(1)–O(1), 124.52(13); O(2)–Al(1)–N(1), 122.09(13); O(2)–Al(1)–N(2), 90.72(12); N(1)–Al(1)–Cl(1), 90.40(9); N(1)–Al(1)–N(2), 82.40(12); N(2)–Al(1)–Cl(1), 172.39(10).

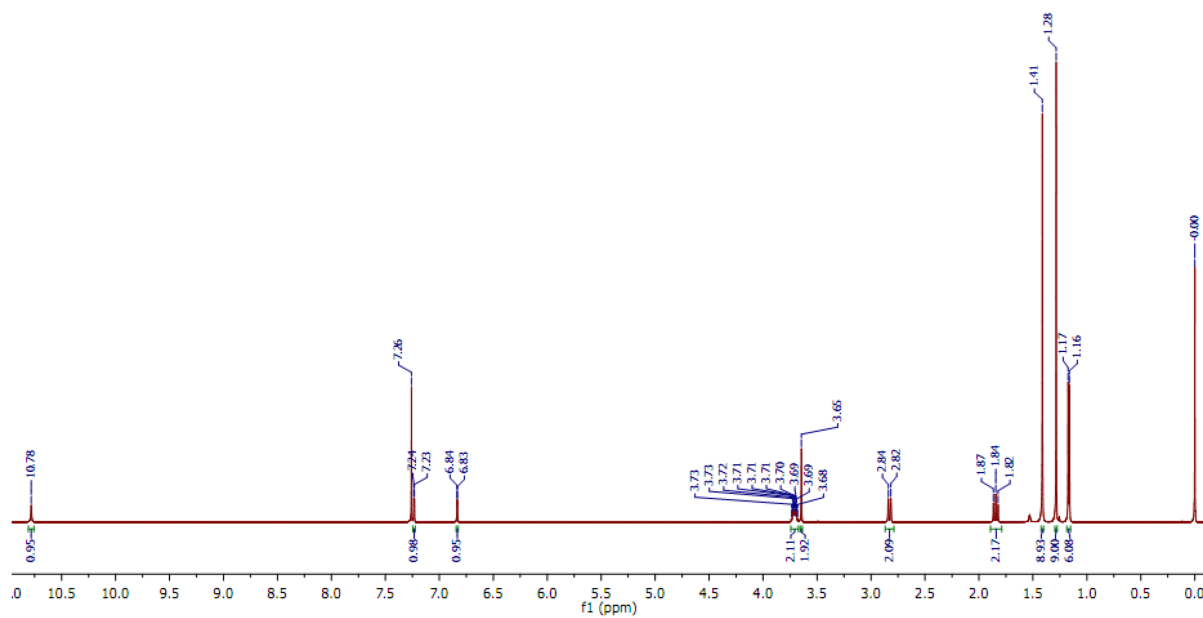

**Figure S2.**  $^1\text{H}$  NMR spectrum of H[L2] in  $\text{CDCl}_3$ , 298 K

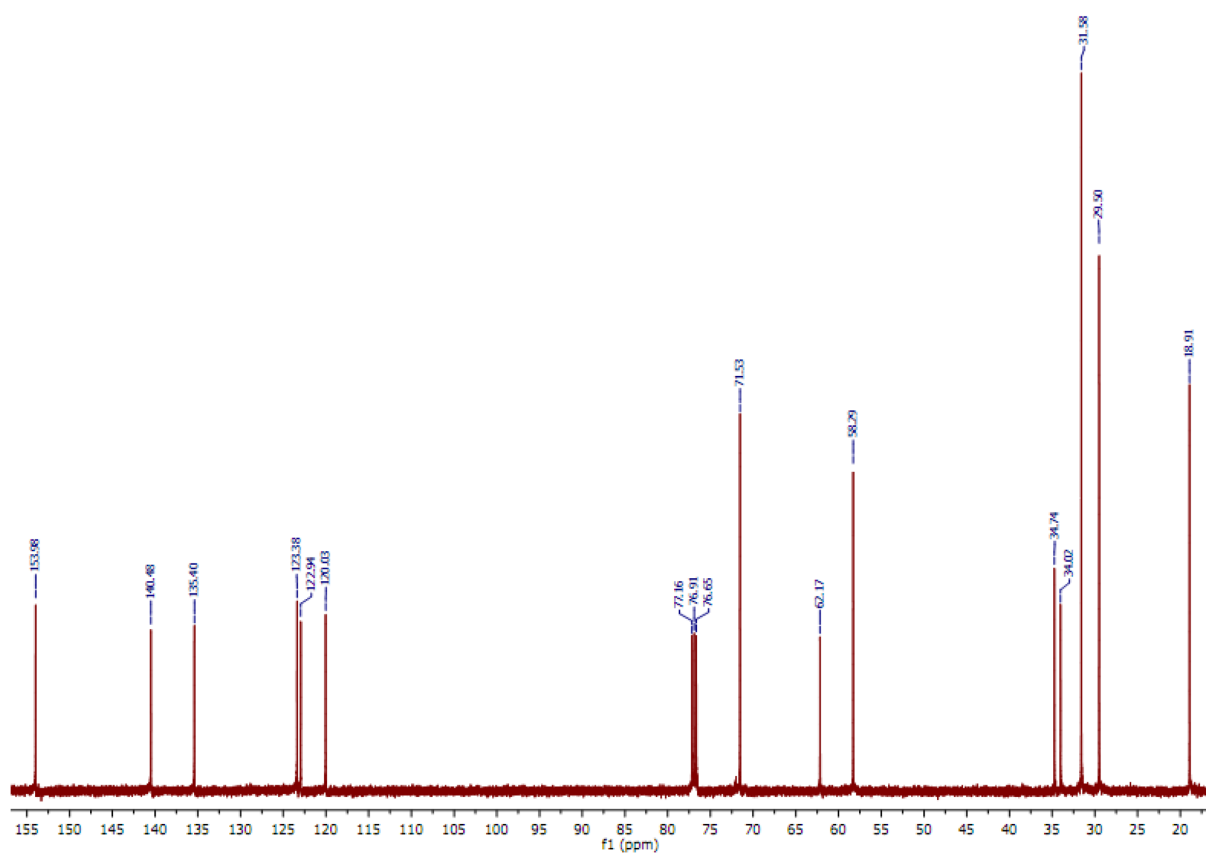

**Figure S3.**  $^{13}\text{C}$   $\{^1\text{H}\}$  NMR spectrum of H[L2] in  $\text{CDCl}_3$ , 298 K

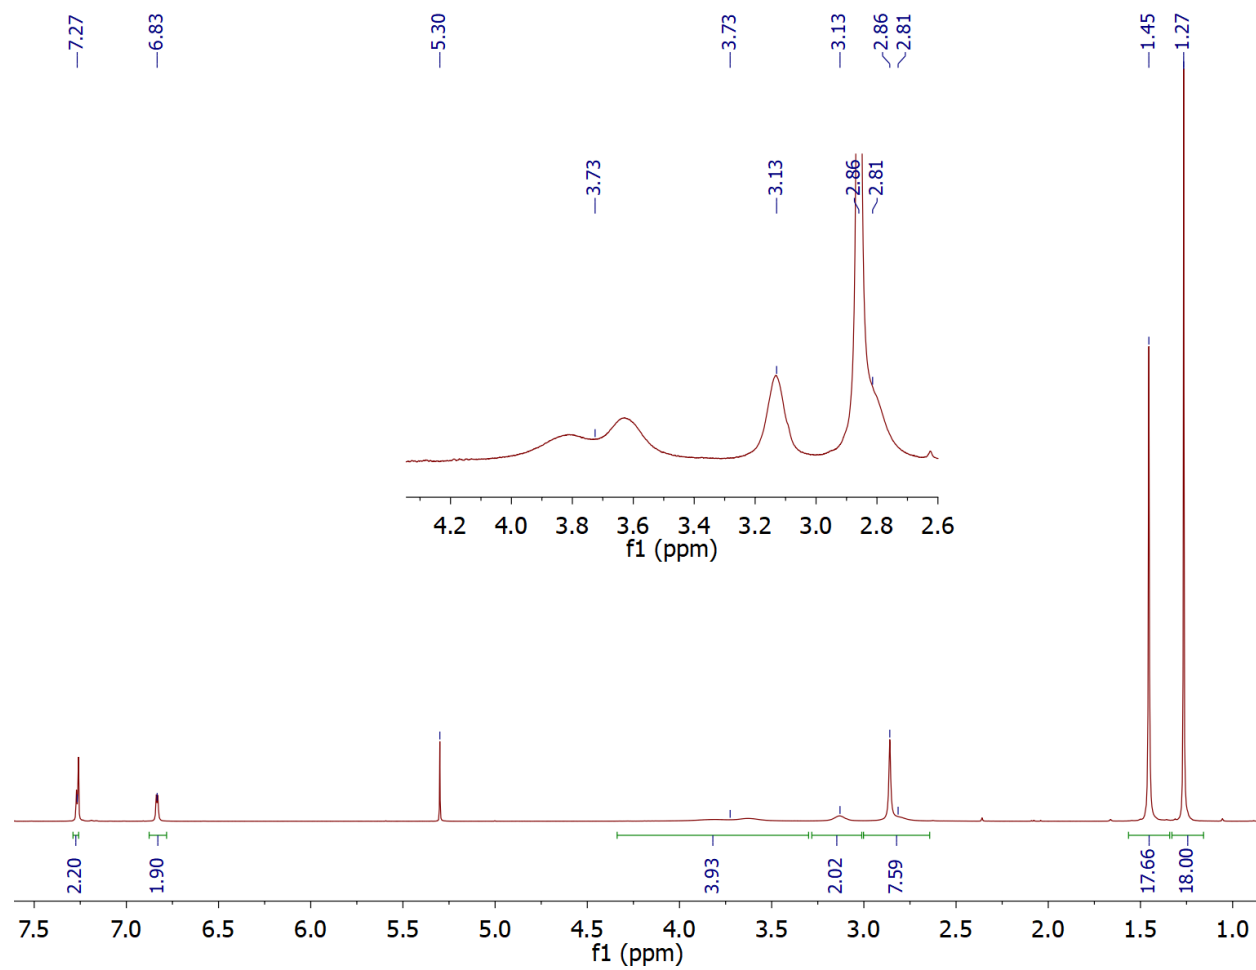

**Figure S4.**  $^1\text{H}$  NMR spectrum of **2** in  $\text{CDCl}_3$ , 298 K

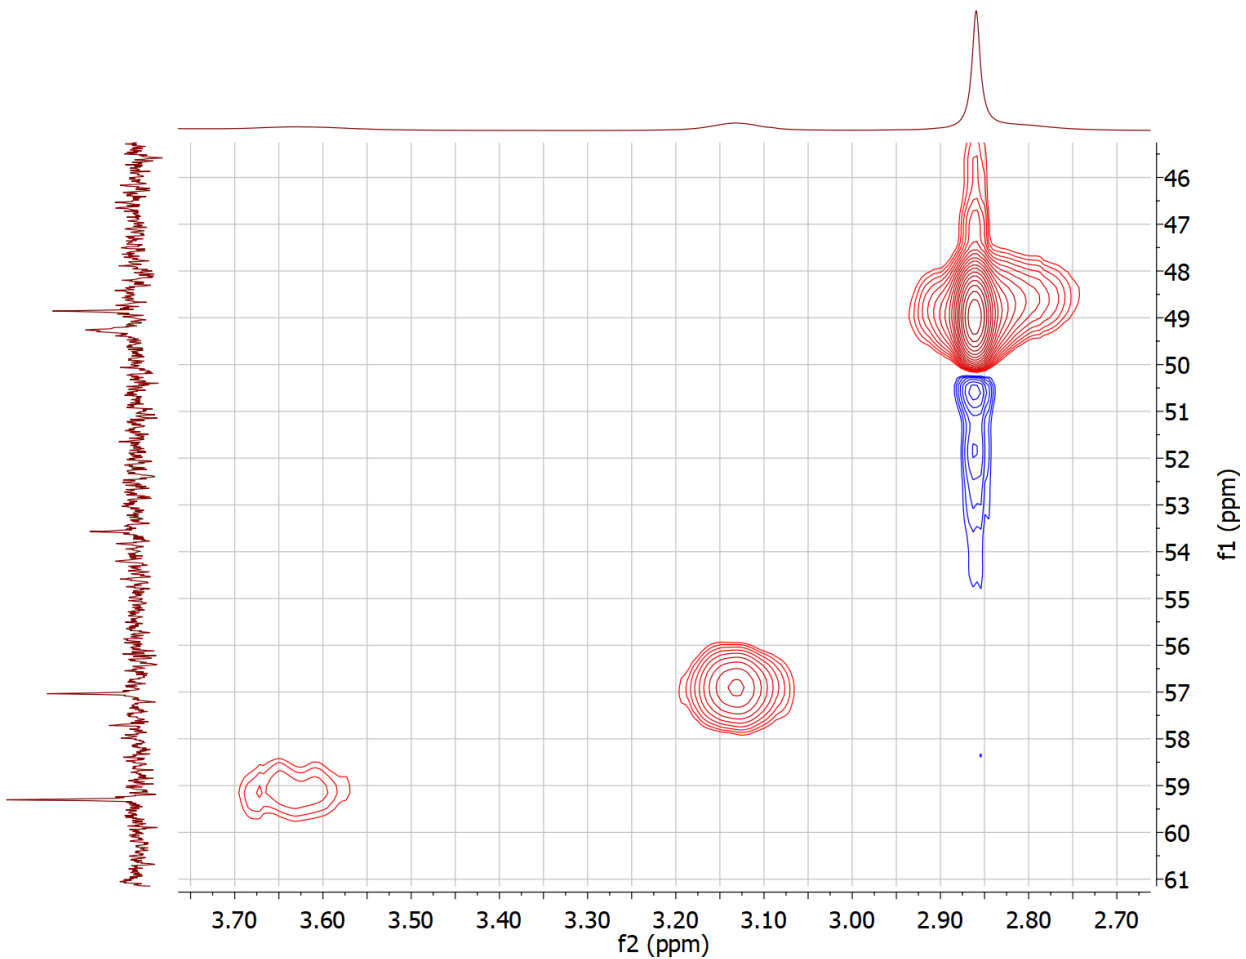

**Figure S5.** HSQC spectrum of **2** in  $\text{CDCl}_3$ , 298 K



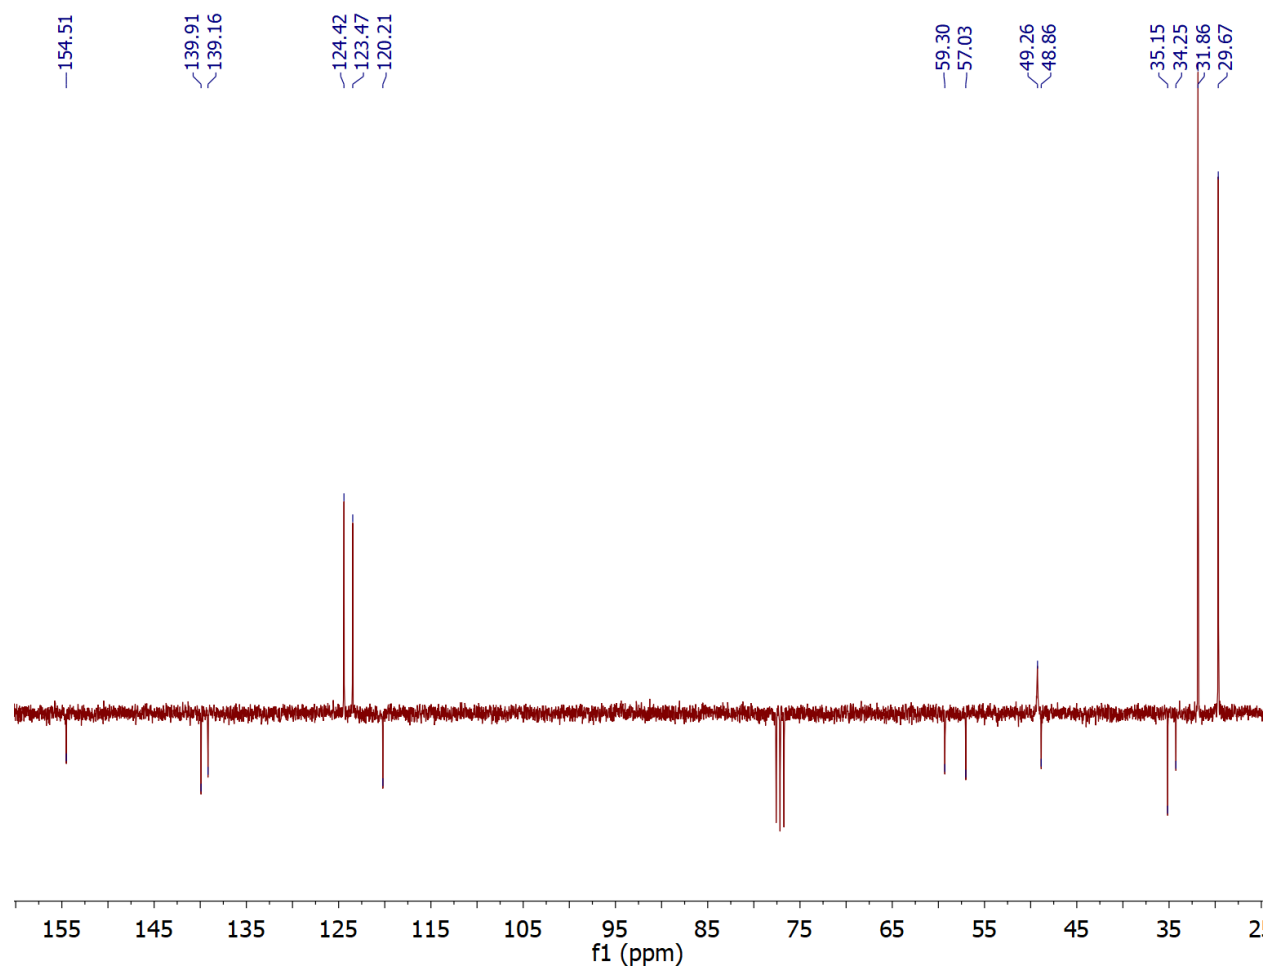

**Figure S6.**  $^{13}\text{C}$ -DEPT NMR spectrum of **2** in  $\text{CDCl}_3$ , 298 K

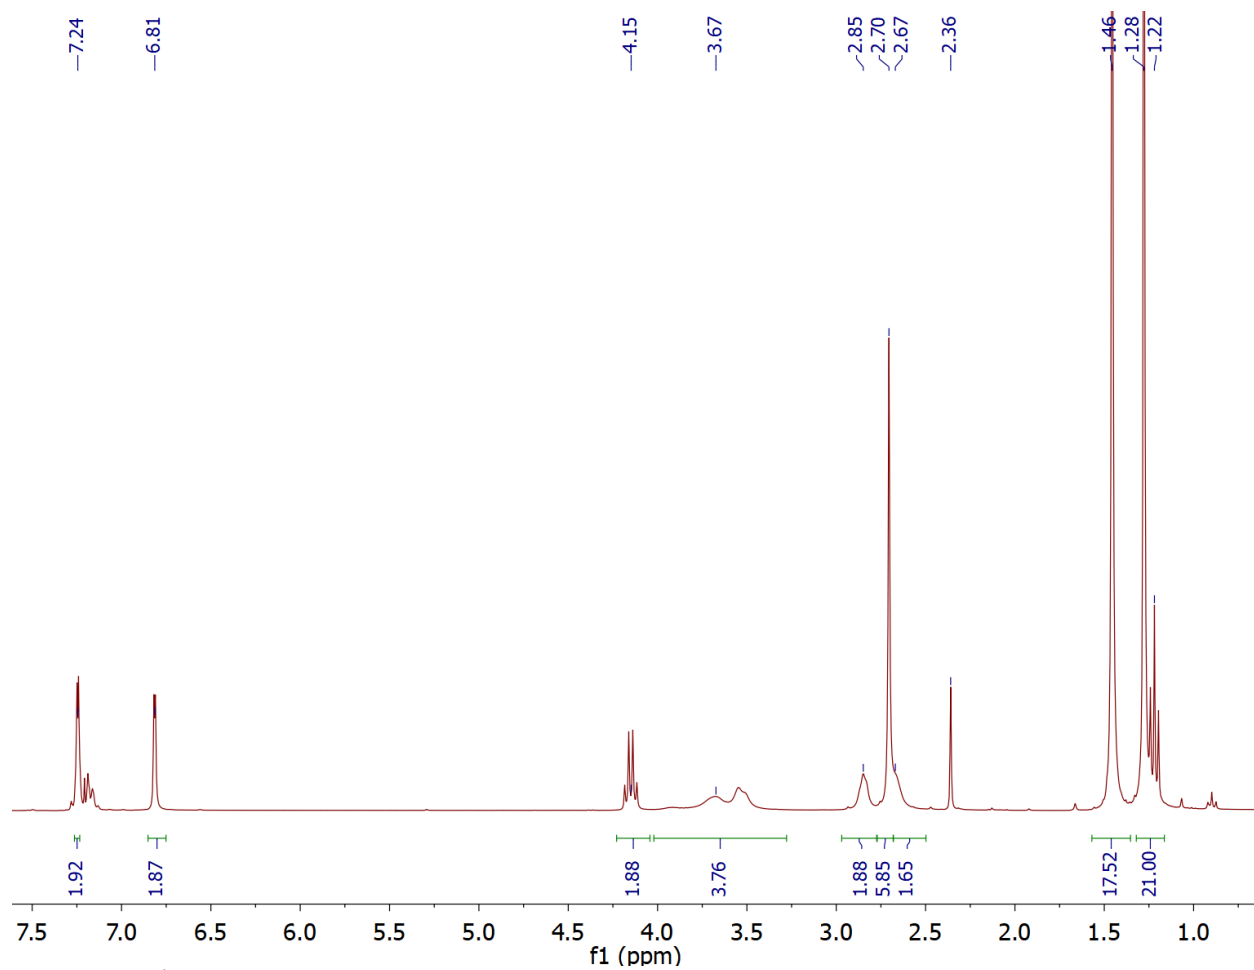

**Figure S7.**  $^1\text{H}$  NMR spectrum of **3** in  $\text{CDCl}_3$ , 298 K (residual toluene resonance at 2.36 ppm)

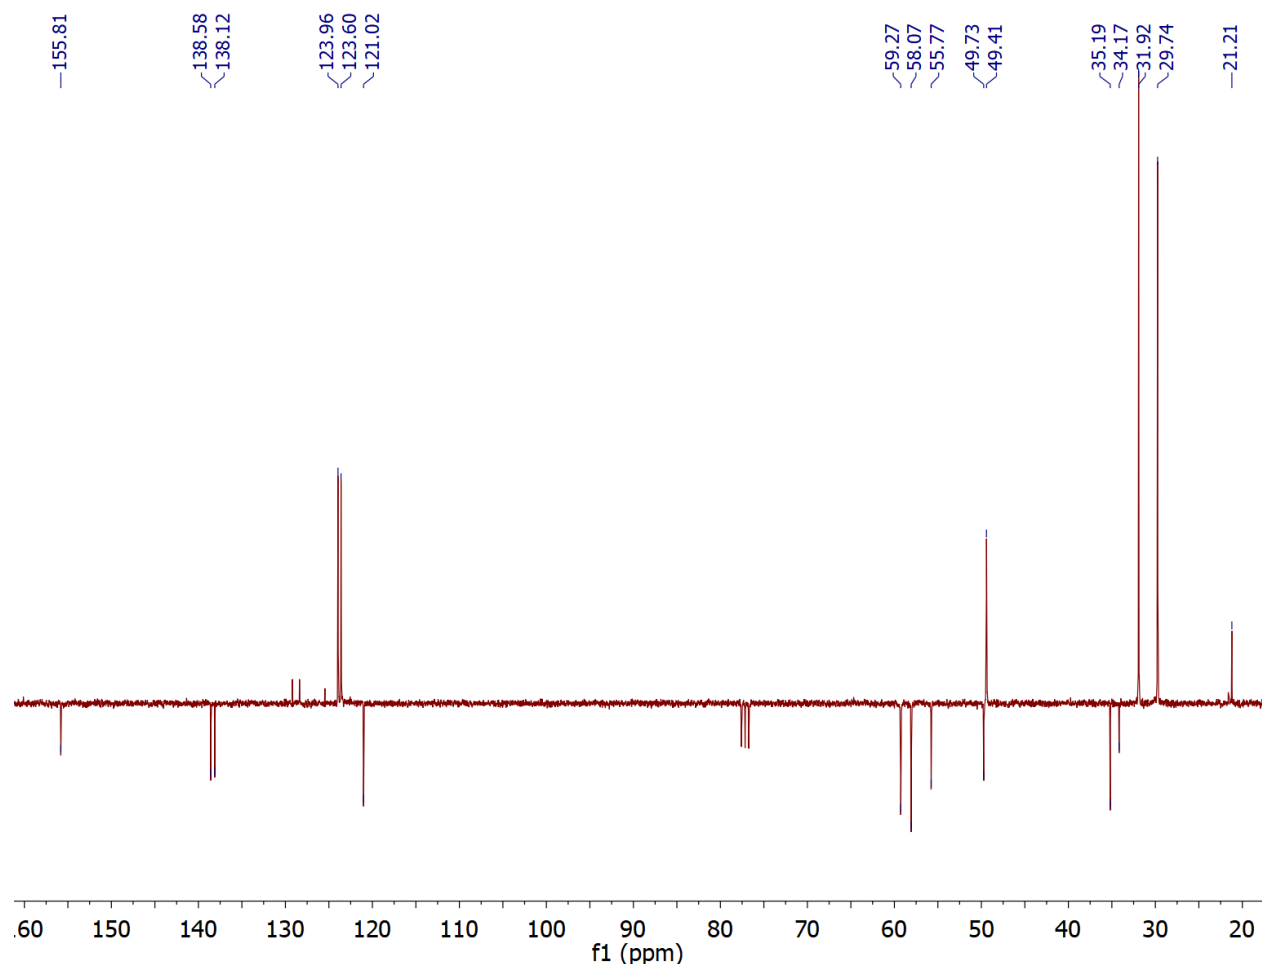

**Figure S8.**  $^{13}\text{C}$ -DEPT NMR spectrum of **3** in  $\text{CDCl}_3$ , 298 K

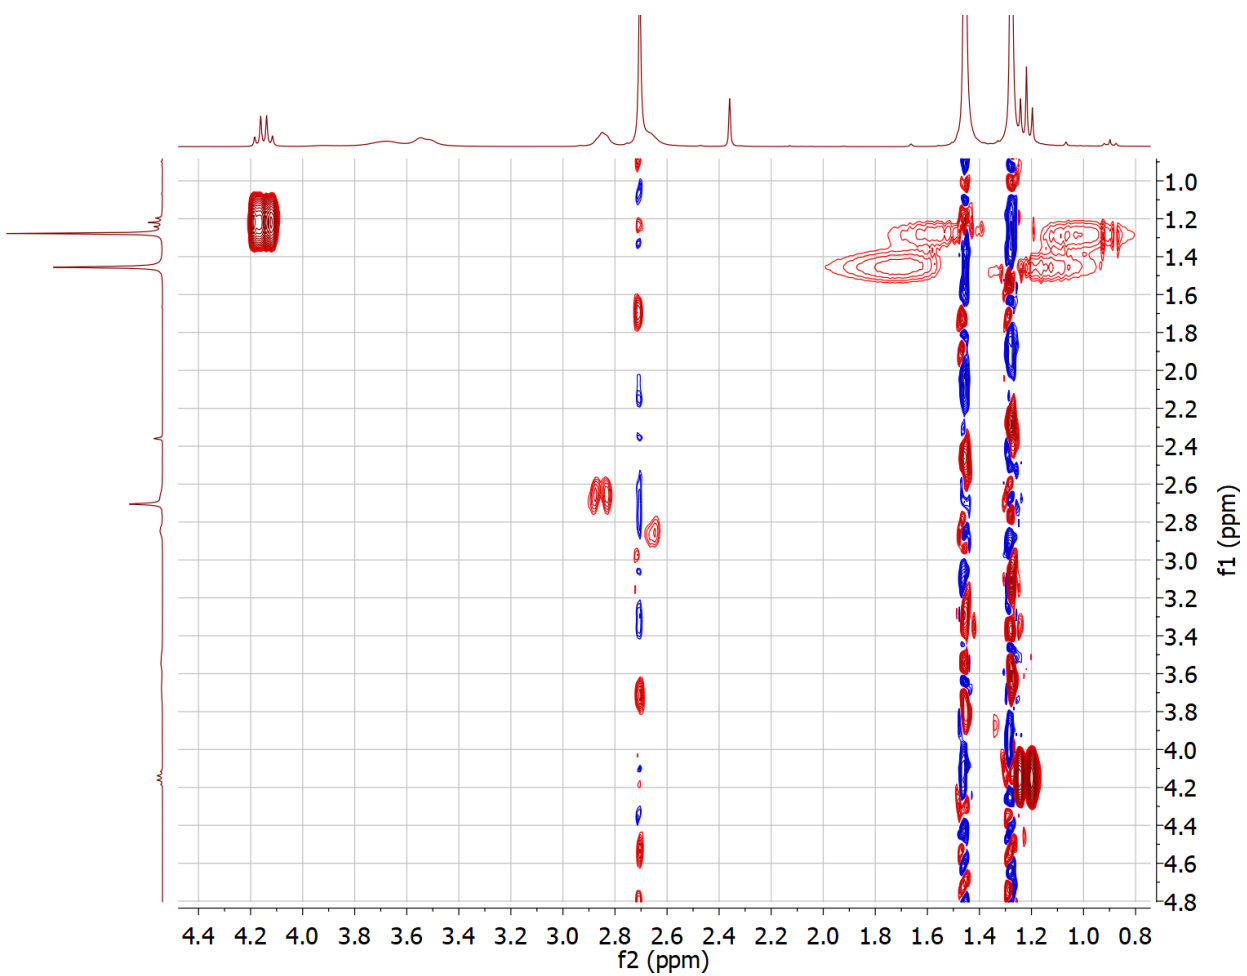

**Figure S9.** COSY spectrum of **3** in  $\text{CDCl}_3$ , 298 K

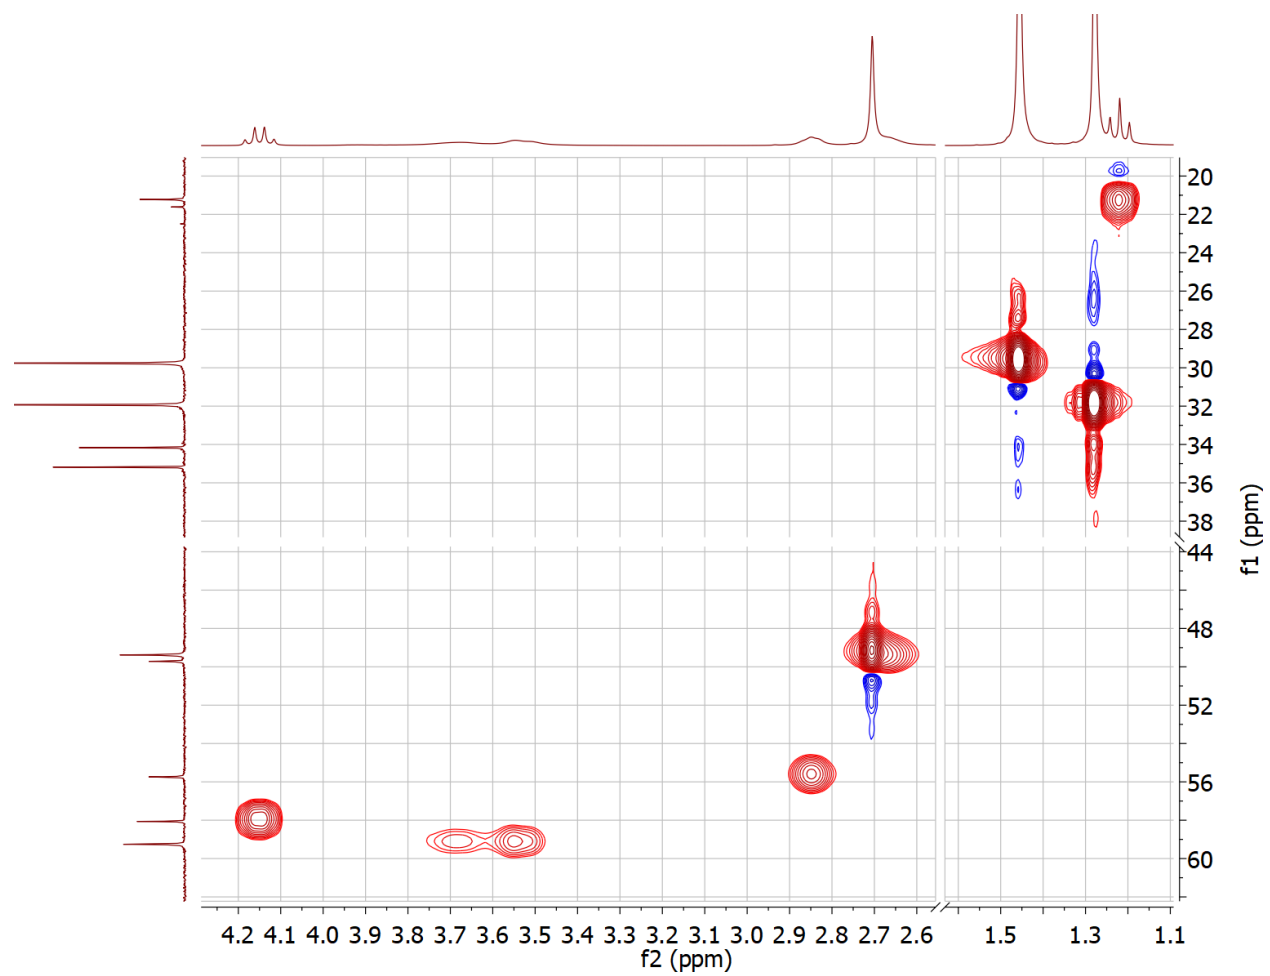

**Figure S10.** HSQC spectrum of **3** in CDCl<sub>3</sub>, 298 K

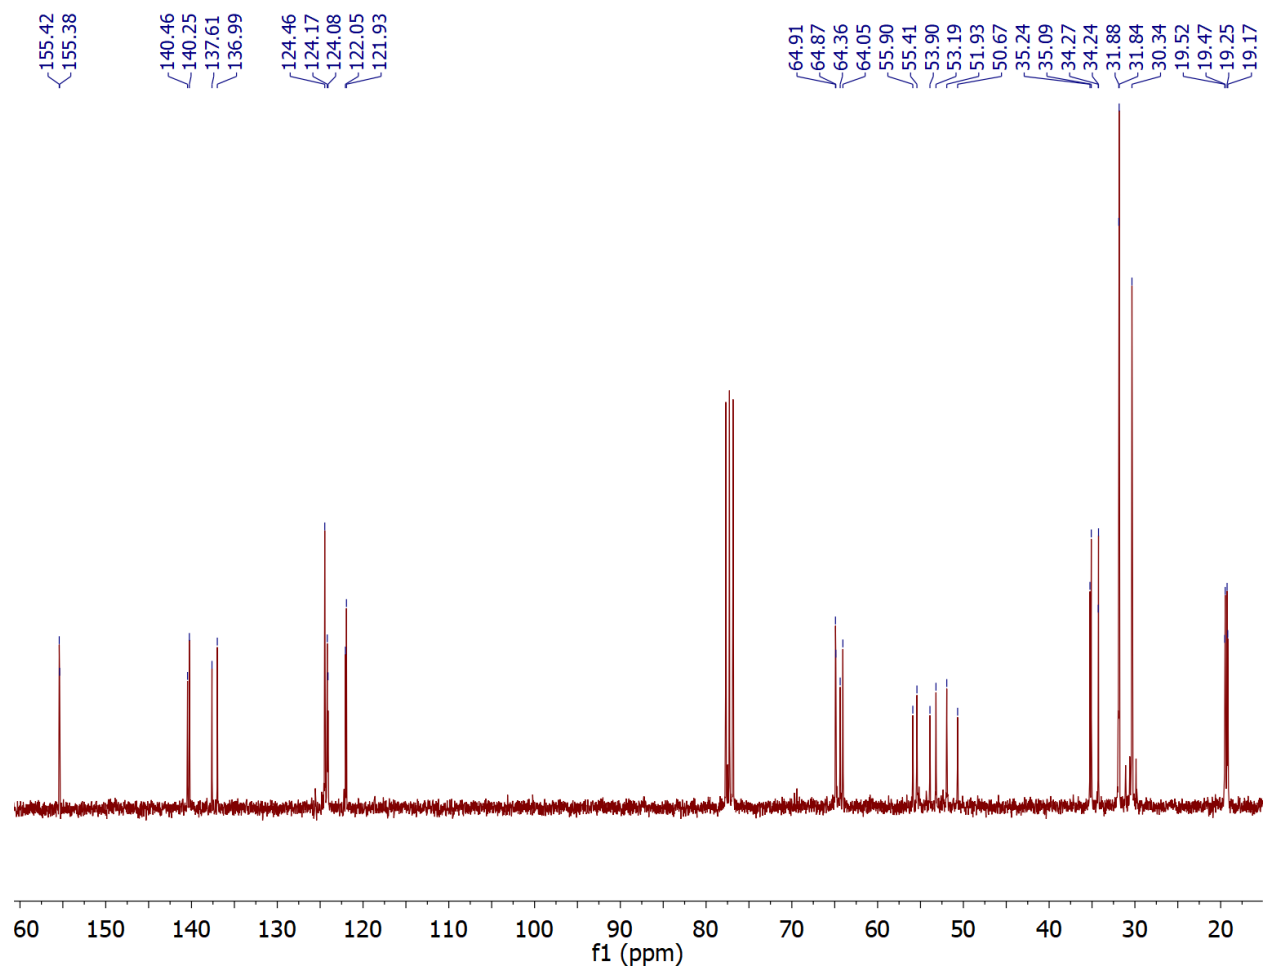

**Figure S11.** <sup>13</sup>C spectrum of 4 in CDCl<sub>3</sub>, 298 K

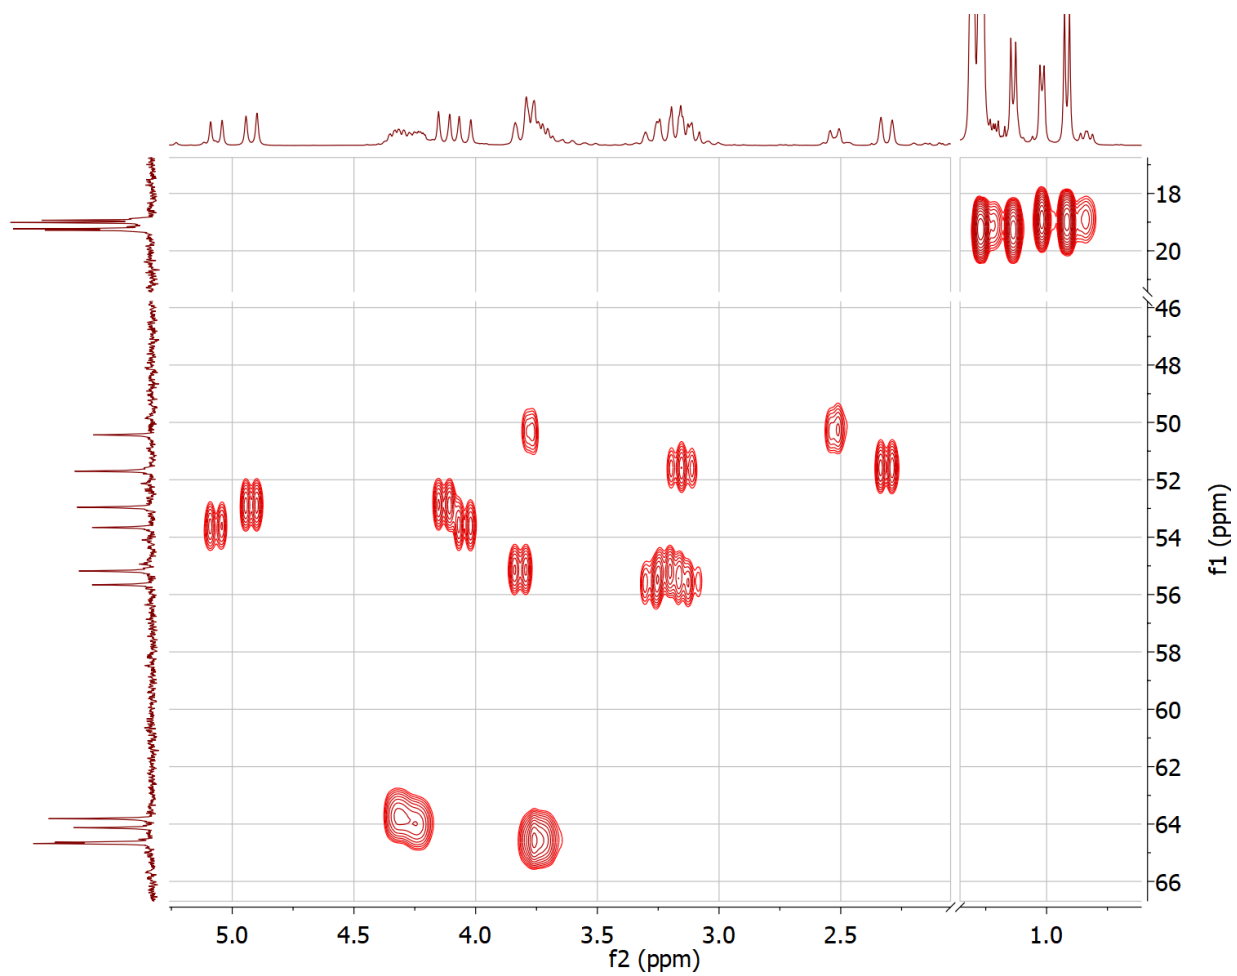

**Figure S12.** HSQC spectrum of **4** in  $\text{CDCl}_3$ , 298 K

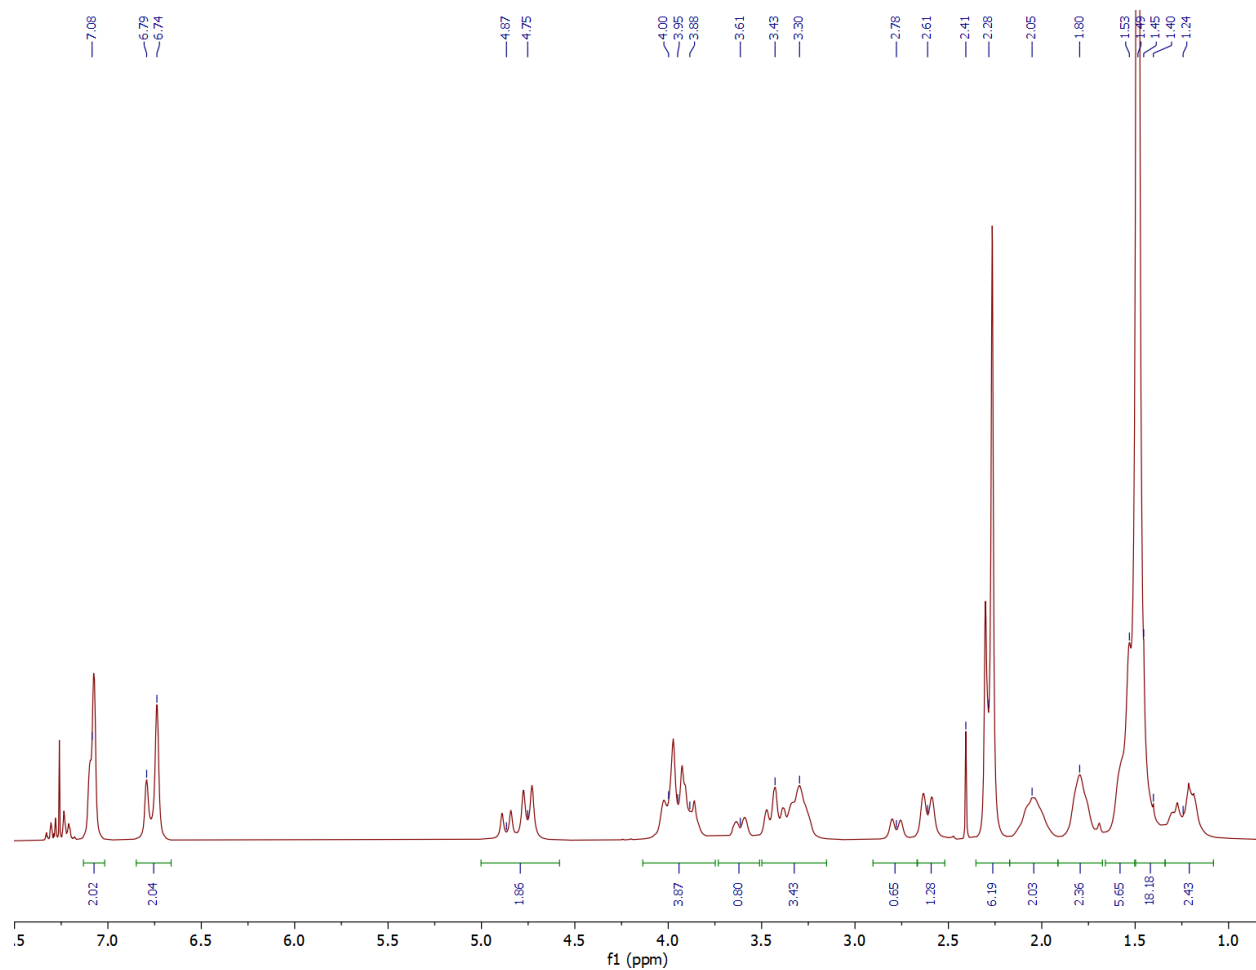

**Figure S13.** <sup>1</sup>H NMR spectrum of **5** in CDCl<sub>3</sub>, 298 K (residual toluene resonance at 2.41 ppm)



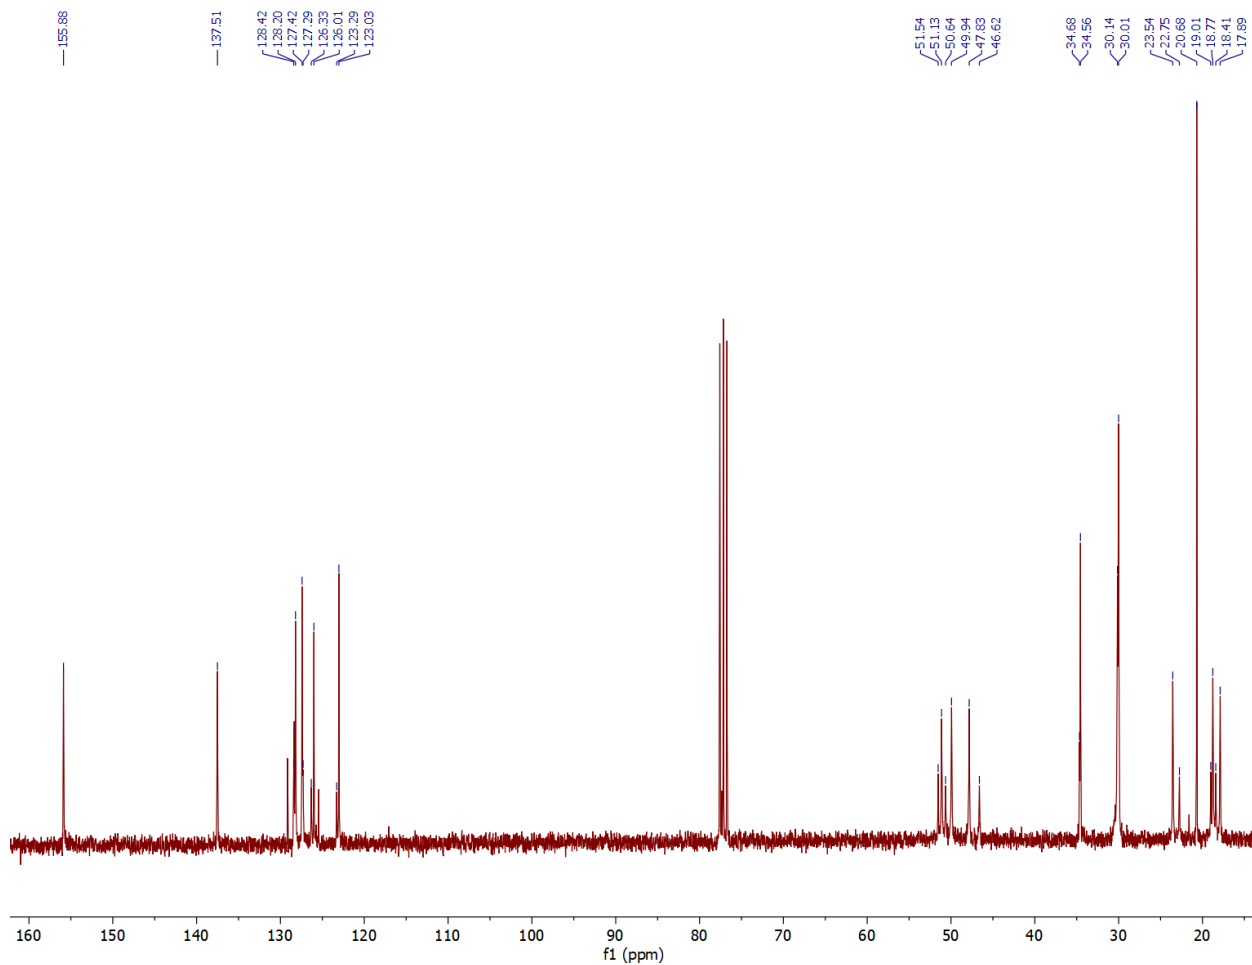

**Figure S14.**  $^{13}\text{C}$  NMR spectrum of **5** in  $\text{CDCl}_3$ , 298 K

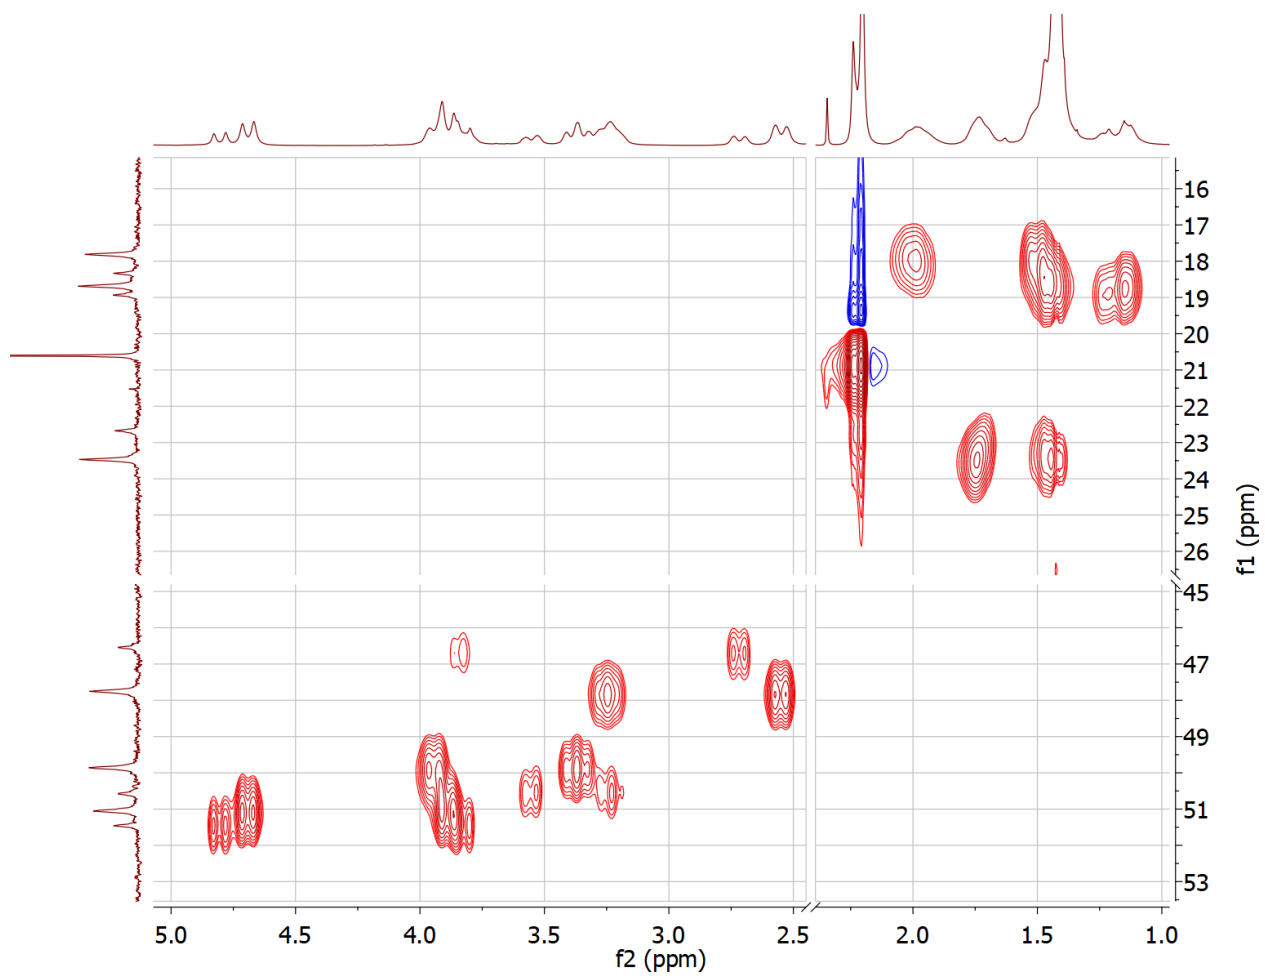

**Figure S15.** HSQC spectrum of **5** in  $\text{CDCl}_3$ , 298 K

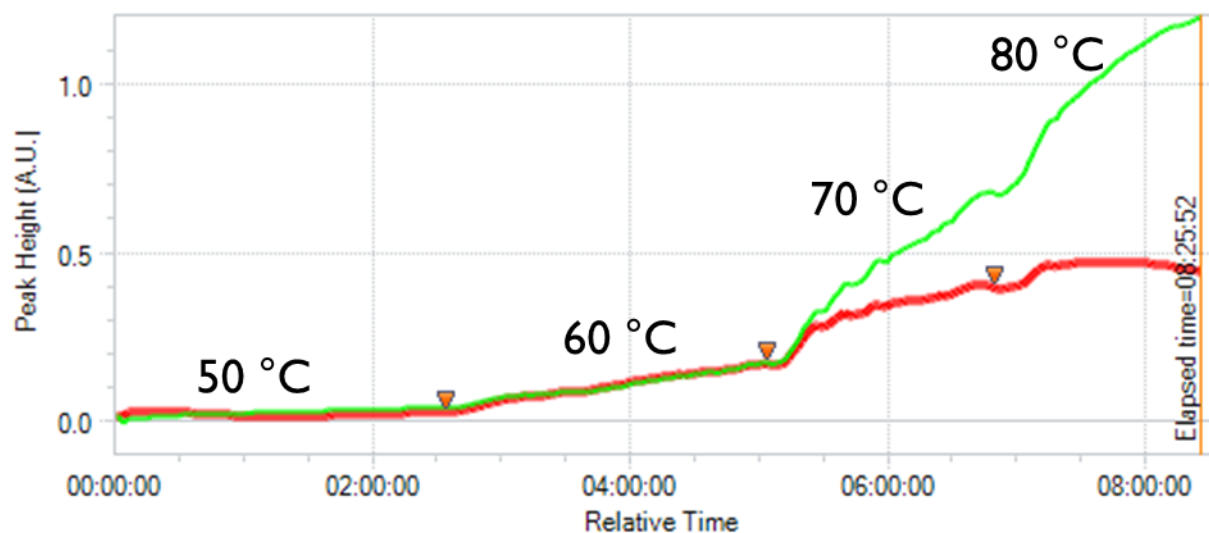

**Figure S16.** Monitoring of IR absorptions over time at variable temperatures for the reaction of **1**+PPNCl+CHO (1/1/500) at 40 bar CO<sub>2</sub>. Red (1800 cm<sup>-1</sup>, CHC formation) and green (1750 cm<sup>-1</sup>, PCHC formation). Note: Under ideal circumstances, individual and replicant reactions should be performed at each temperature.

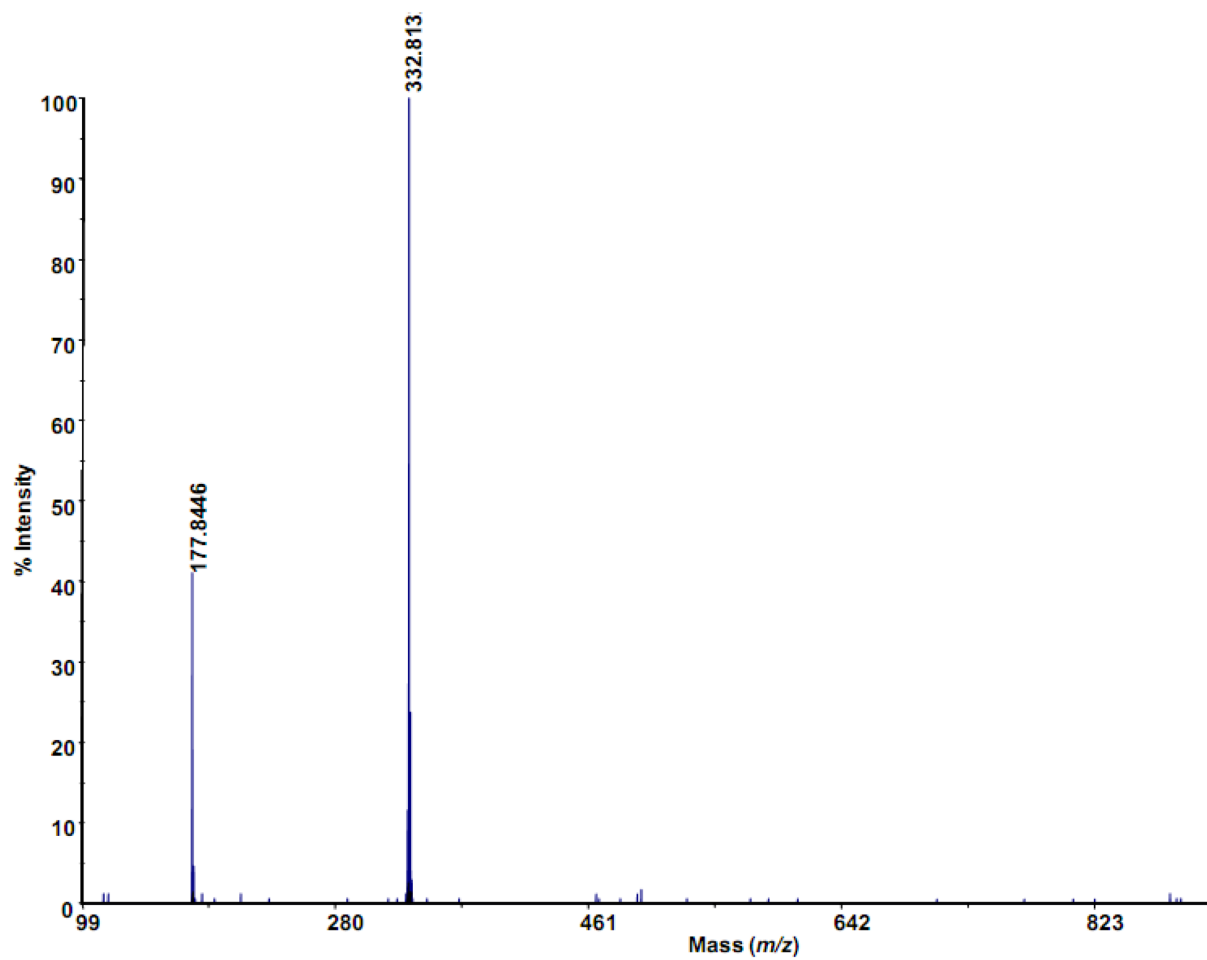

**Figure S17.** MALDI-TOF mass spectrum of H[L2]

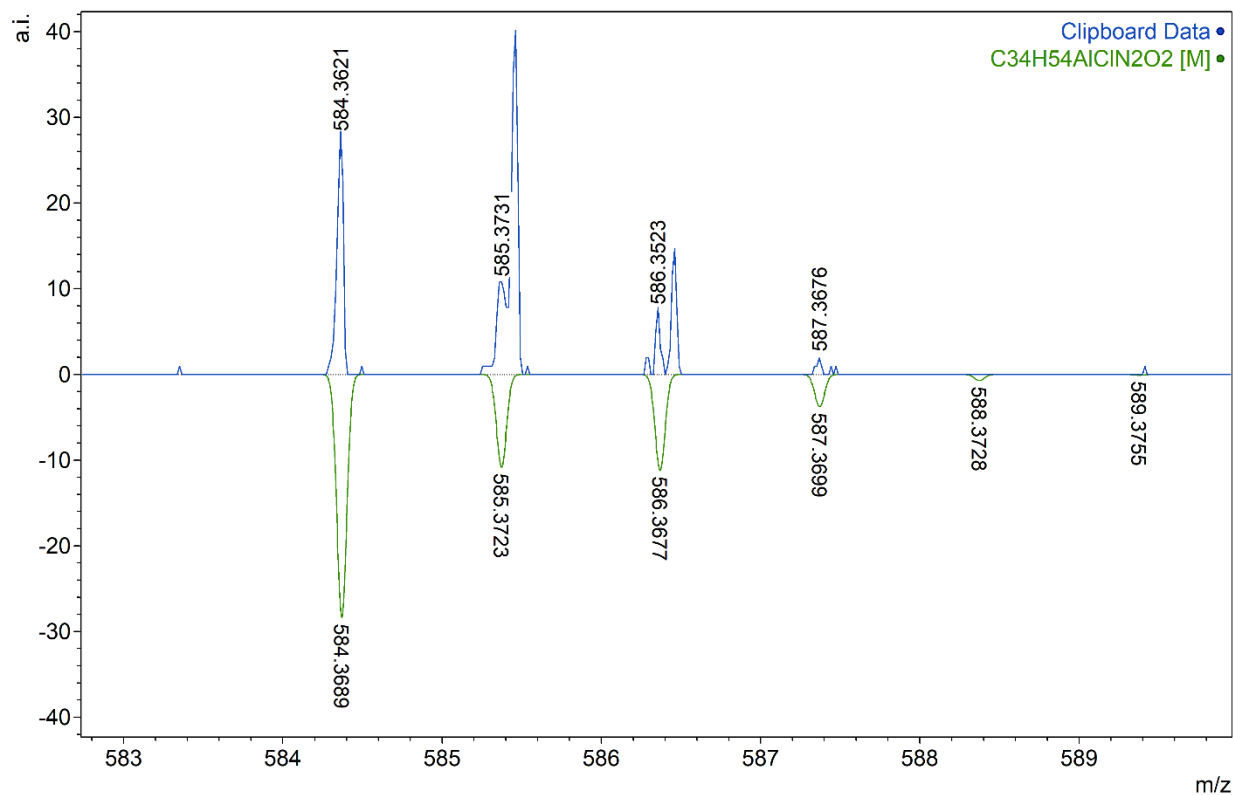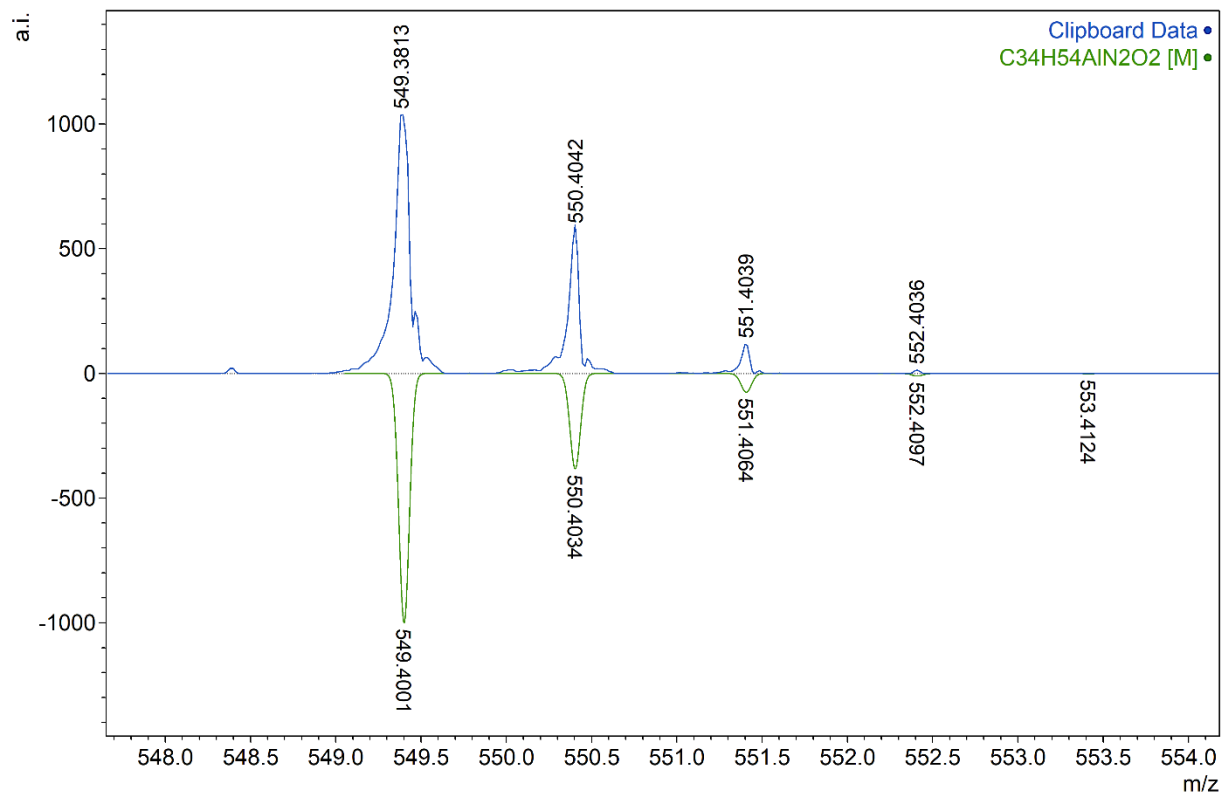

Figure S18. MALDI-TOF MS spectra of 2

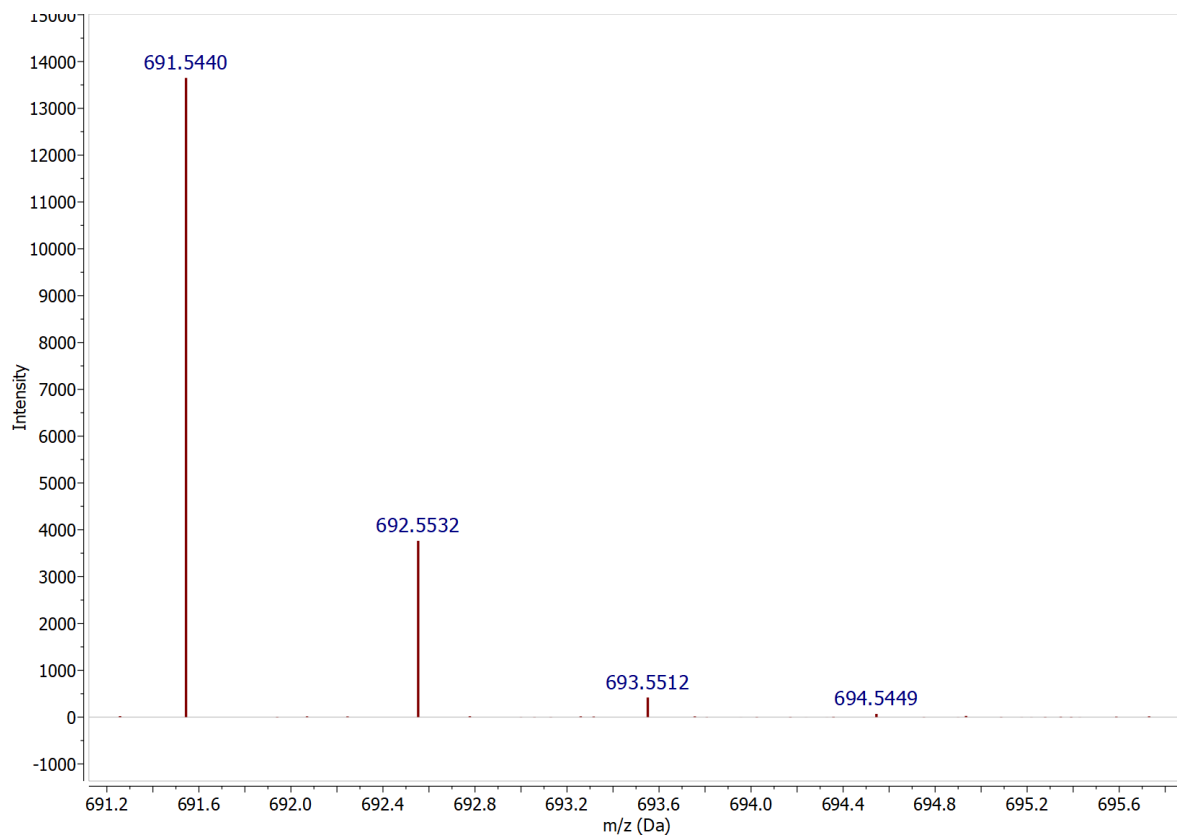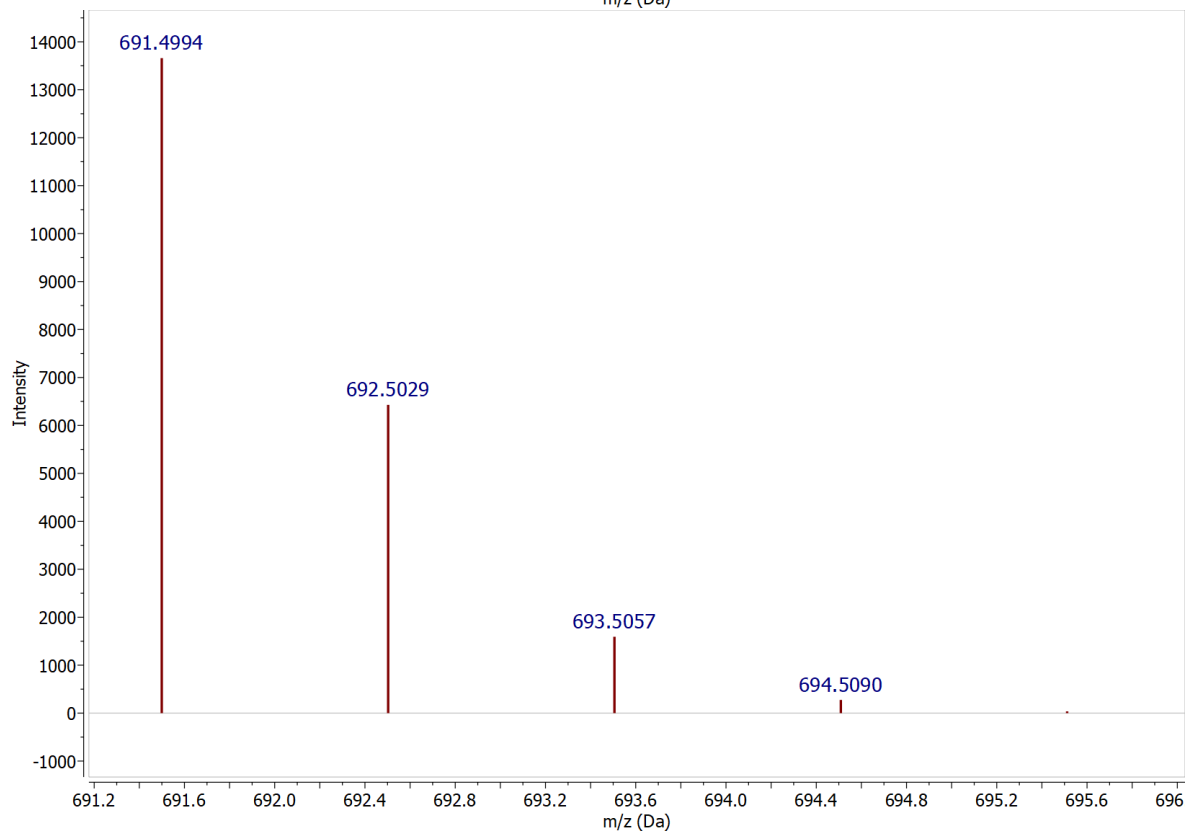

**Figure S19.** MALDI-TOF mass spectra of **4.3** (experimental – top, theoretical – bottom)

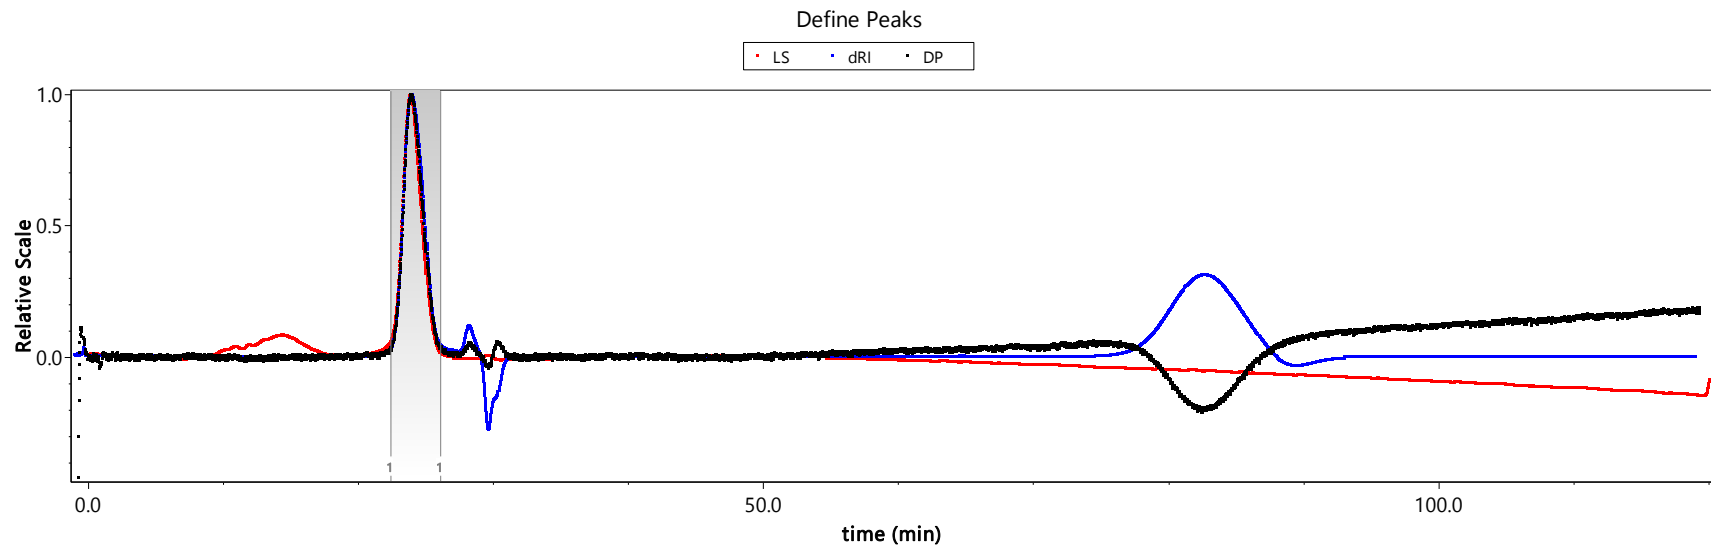

**Figure S20.** Representative GPC trace of isolated PCHC (Table 1, entry 6; the peaks around 80 min are due to the delay volume)

**Table S2.** Experimental (X-ray) and calculated (M06/6-311+G(d,p)) bond distances of **1**, **2**, **4**, and **5**

| Cat.     | Al–O(phenolate)<br>(Å) |       | Al–N(axial) <sup>a</sup><br>(Å) |       | Al–N(pendent)<br>(Å) |       | Al–Cl<br>(Å) |       |
|----------|------------------------|-------|---------------------------------|-------|----------------------|-------|--------------|-------|
|          | Expt                   | Calcd | Expt                            | Calcd | Expt                 | Calcd | Expt         | Calcd |
| <b>1</b> | 1.75                   | 1.77  | 2.10                            | 2.16  | 2.08                 | 2.07  | 2.26         | 2.28  |
|          | 1.75                   | 1.77  |                                 |       |                      |       |              |       |
| <b>2</b> | 1.75                   | 1.77  | 2.12                            | 2.19  | 2.07                 | 2.06  | 2.25         | 2.27  |
|          | 1.75                   | 1.77  |                                 |       |                      |       |              |       |
| <b>4</b> | 1.77                   | 1.77  | 2.13                            | 2.13  | –                    | –     | 2.20         | 2.20  |
|          | 1.77                   | 1.77  |                                 |       |                      |       |              |       |
| <b>5</b> | 1.77                   | 1.78  | 2.12                            | 2.15  | –                    | –     | 2.20         | 2.20  |
|          | 1.77                   | 1.78  |                                 |       |                      |       |              |       |

<sup>a</sup> In **4** and **5**, the pendent nitrogen donors also assume axial positions.



**Table S3.** Calculated charges of pendent nitrogen in initial pro-ligands and Al-Cl complexes

| Complex  | Mulliken |       | MSK     |       | CM5     |       | NBO     |       | DDEC6   |       |
|----------|----------|-------|---------|-------|---------|-------|---------|-------|---------|-------|
|          | Initial  | Al-Cl | Initial | Al-Cl | Initial | Al-Cl | Initial | Al-Cl | Initial | Al-Cl |
| <b>1</b> | -0.03    | -0.97 | -0.49   | -0.34 | -0.39   | -0.32 | -0.59   | -0.66 | -0.22   | -0.22 |
| <b>2</b> | -0.10    | -1.11 | -0.28   | -0.20 | -0.40   | -0.32 | -0.59   | -0.69 | -0.16   | -0.15 |

**Table S4.** Calculated (M06/6-311+G(d,p)) Al charges and relevant bond distances of Al-carbonate derivatives

| Cat.     | Mulliken | MSK  | CM5  | NBO  | DDEC6 | Al-N(pendent)<br>(Å) | Al-carbonate<br>(Å) |
|----------|----------|------|------|------|-------|----------------------|---------------------|
| <b>1</b> | 1.37     | 1.18 | 0.48 | 2.10 | 1.48  | 2.08                 | 1.84                |
| <b>2</b> | -0.02    | 1.12 | 0.47 | 2.10 | 1.48  | 2.04                 | 1.85                |
| <b>4</b> | -1.69    | 0.63 | 0.49 | 2.18 | 1.51  | 2.14, 2.12           | 1.81                |
| <b>5</b> | -1.69    | 0.55 | 0.48 | 2.18 | 1.51  | 2.13, 2.13           | 1.81                |

**Table S5.** Highly active catalyst systems for copolymerization of CHO/CO<sub>2</sub>

| Entry          | Ref | Cat.                       | Cocat. | T (°C) | P (bar) | % copolymer | TOF (h <sup>-1</sup> ) |
|----------------|-----|----------------------------|--------|--------|---------|-------------|------------------------|
| 1 <sup>a</sup> | 1   | <b>Zn<sub>2</sub></b>      | -      | 100    | 40      | 83          | 85500                  |
| 2 <sup>b</sup> | 2   | <b>MgCo</b>                | -      | 140    | 20      | >99         | 12460                  |
| 3 <sup>c</sup> | 3   | <b>Co<sub>2</sub>salen</b> | PPNX   | 25     | 20      | >99         | 1409                   |

<sup>a</sup> 0.025 mol% catalyst <sup>b</sup> 0.05 mol% catalyst <sup>c</sup> 0.1 mol% catalyst, 0.2 mol% PPNX (X = 2,4-dinitrophenoxide)

## References

1. S. Kissling, M. W. Lehenmeier, P. T. Altenbuchner, A. Kronast, M. Reiter, P. Deglmann, U. B. Seemann and B. Rieger, *Chem. Commun.*, 2015, **51**, 4579-4582.
2. A. C. Deacy, A. F. R. Kilpatrick, A. Regoutz and C. K. Williams, *Nat. Chem.*, 2020, **12**, 372-380.
3. Y. Liu, W. M. Ren, J. Liu and X. B. Lu, *Angew. Chem. Int. Ed.*, 2013, **52**, 11594-11598.

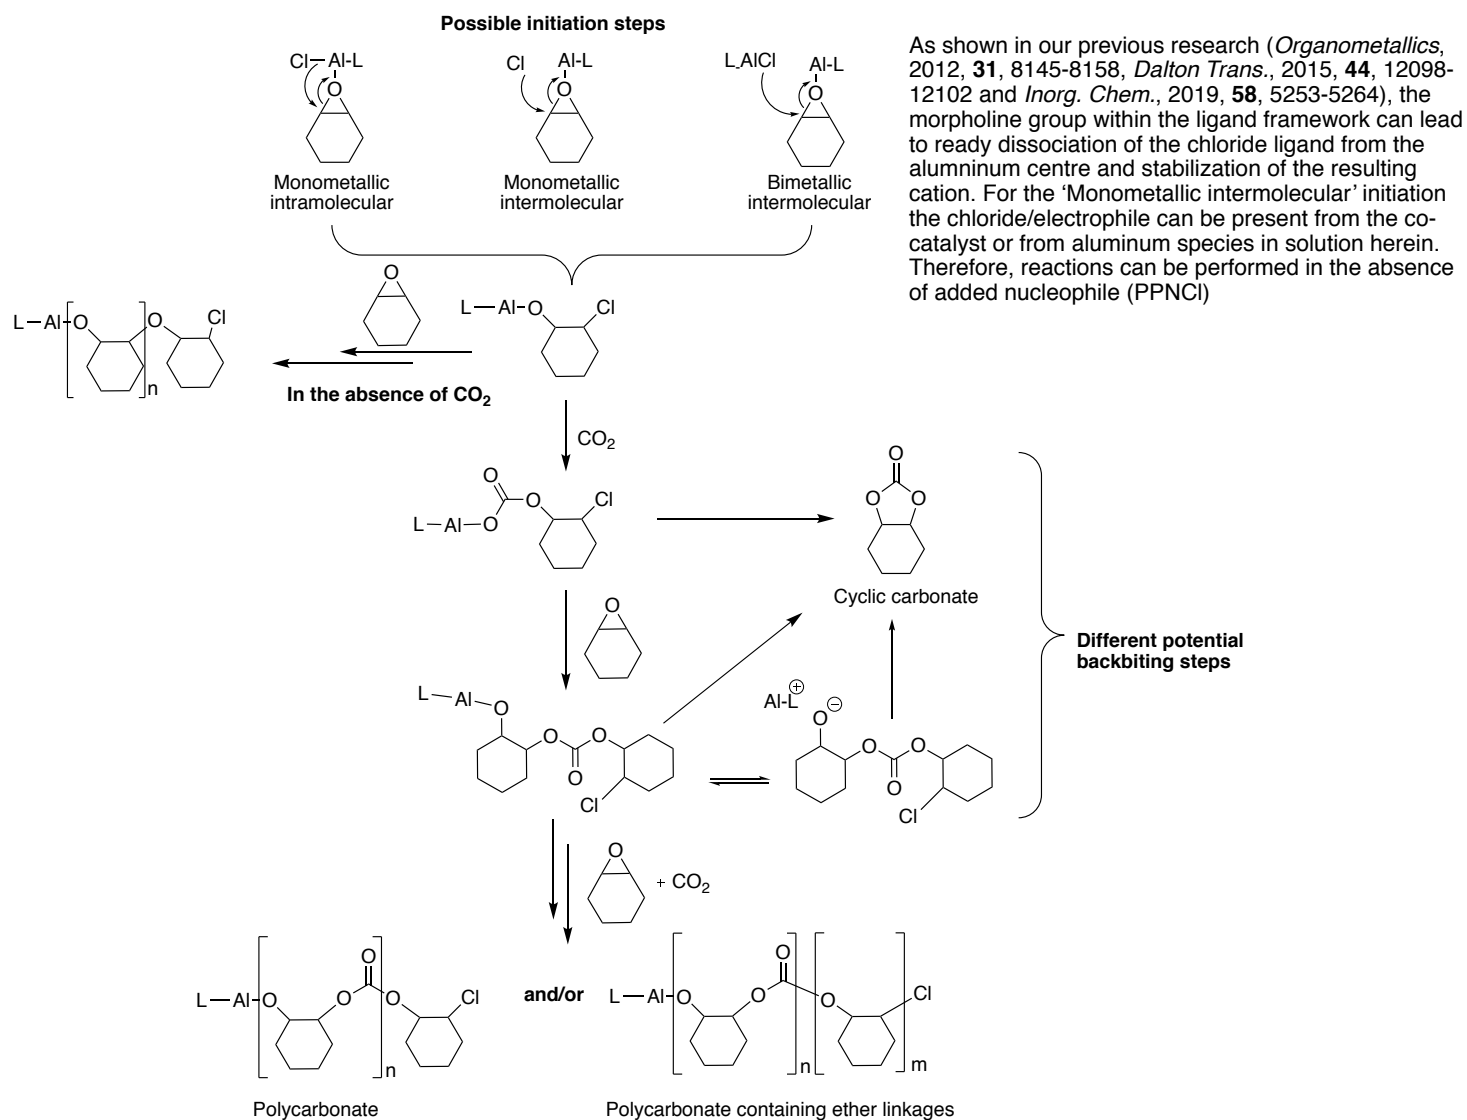

**Figure S21.** Possible catalytic mechanisms for ROCOP mediated by Al complexes
